# Supplementary material for: Indole Diketopiperazine Alkaloids from the Marine Sediment-Derived Fungus Aspergillus chevalieri against Pancreatic Ductal Adenocarcinoma
Source: MDPI journal article supplement (doi:10.3390/md22010005), 2023-12-20

## Supplementary Material

### Indole Diketopiperazine Alkaloids from the Marine Sediment-Derived Fungus *Aspergillus chevalieri* against Pancreatic Ductal Adenocarcinoma

Dina H. El-Kashef <sup>1,2</sup>, Deborah D. Obidake <sup>1</sup>, Katja Schiedlauske <sup>1</sup>, Alina Deipenbrock <sup>1</sup>, Sebastian Scharf <sup>3</sup>, Hao Wang <sup>4</sup>, Daniela Naumann <sup>5</sup>, Daniel Friedrich <sup>5</sup>, Simone Miljanovic <sup>1</sup>, Takin Haj Hassani Sohi <sup>6</sup>, Christoph Janiak <sup>6</sup>, Klaus Pfeffer <sup>3</sup>, Peter Proksch <sup>1</sup> and Nicole Teusch <sup>1,\*</sup>

1 Institute of Pharmaceutical Biology and Biotechnology, Heinrich Heine University Dusseldorf, 40225 Dusseldorf, Germany; dihas102@hhu.de (D.H.E.-K.)

2 Department of Pharmacognosy, Faculty of Pharmacy, Minia University, 61519 Minia, Egypt

3 Institute of Medical Microbiology and Hospital Hygiene, Medical Faculty, Heinrich Heine University, 40225 Dusseldorf, Germany

4 Hainan Key Laboratory for Research and Development of Natural Products from Li Folk Medicine, Institute of Tropical Bioscience and Biotechnology, Chinese Academy of Tropical Agricultural Sciences, Haikou 571101, China

5 Department of Chemistry and Biochemistry, University of Cologne, 50939 Cologne, Germany

6 Institute of Inorganic Chemistry and Structural Chemistry, Heinrich Heine University Dusseldorf, 40225 Dusseldorf, Germany

\* Correspondence: nicole.teusch@hhu.de; Tel.: +49-(0)-211-81-14163

#### Contents

|                                                                                                      |   |
|------------------------------------------------------------------------------------------------------|---|
| Figure S1. UV spectrum of compound <b>1</b> .....                                                    | 2 |
| Figure S2. HRESIMS of compound <b>1</b> .....                                                        | 3 |
| Figure S3. <sup>1</sup> H NMR (600 MHz, CDCl <sub>3</sub> ) spectrum of compound <b>1</b> .....      | 4 |
| Figure S4. APT <sup>13</sup> C NMR (150 MHz, CDCl <sub>3</sub> ) spectrum of compound <b>1</b> ..... | 5 |
| Figure S5. COSY (600 MHz, CDCl <sub>3</sub> ) spectrum of compound <b>1</b> .....                    | 6 |
| Figure S6. HSQC (600 MHz/150 MHz, CDCl <sub>3</sub> ) spectrum of compound <b>1</b> .....            | 7 |
| Figure S7. HMBC (600 MHz/150 MHz, CDCl <sub>3</sub> ) spectrum of compound <b>1</b> .....            | 8 |

|                                                                                                                                                                                                                                                                                                                                                                                            |    |
|--------------------------------------------------------------------------------------------------------------------------------------------------------------------------------------------------------------------------------------------------------------------------------------------------------------------------------------------------------------------------------------------|----|
| Figure S8. NOESY (600 MHz, CDCl <sub>3</sub> ) spectrum of compound <b>1</b> .....                                                                                                                                                                                                                                                                                                         | 9  |
| Table S1: Crystal data and refinement for compound <b>2</b> . ....                                                                                                                                                                                                                                                                                                                         | 10 |
| Table S2. Fractional atomic coordinates and isotropic or equivalent isotropic displacement parameters (Å <sup>2</sup> ) for Compound <b>2</b> .....                                                                                                                                                                                                                                        | 11 |
| Table S3. Atomic displacement parameters (Å <sup>2</sup> ) for compound <b>2</b> . ....                                                                                                                                                                                                                                                                                                    | 13 |
| Table S4. Geometric parameters (Å, °) for compound <b>2</b> .....                                                                                                                                                                                                                                                                                                                          | 13 |
| Table S5. Hydrogen-bond geometry (Å, °) for compound <b>2</b> . ....                                                                                                                                                                                                                                                                                                                       | 17 |
| Figure S9. a) Section of the packing diagram over the unit cell of compound <b>2</b> determined by single-crystal x-ray diffraction. b) Hydrogen bond network as in dashed yellow lines around a molecule of <b>2</b> in the crystal (the dimethylvinylmethyl or prenyl group, -CMe <sub>2</sub> (CH=CH <sub>2</sub> ) has been omitted for clarity). For details see Table S5 above. .... | 18 |
| Figure S10. X-ray crystallographic structure of compound <b>2</b> .....                                                                                                                                                                                                                                                                                                                    | 19 |

Figure S1. UV spectrum of compound **1**.

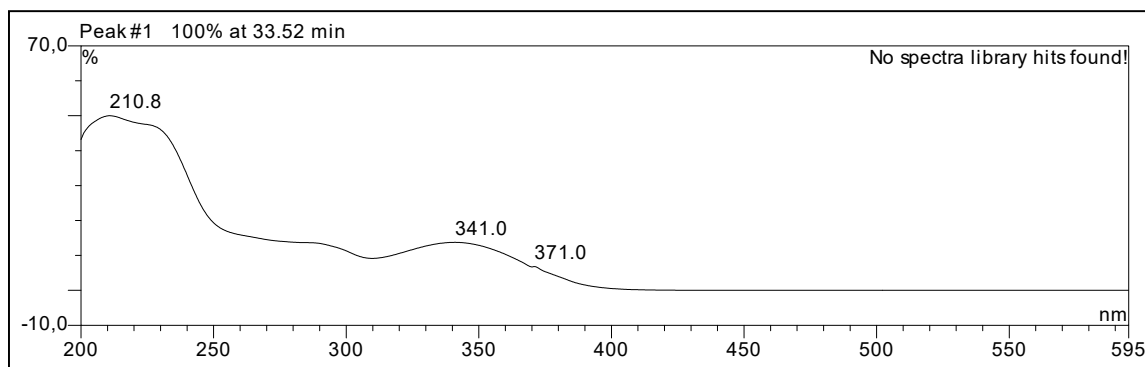

Figure S2. HRESIMS of compound 1.

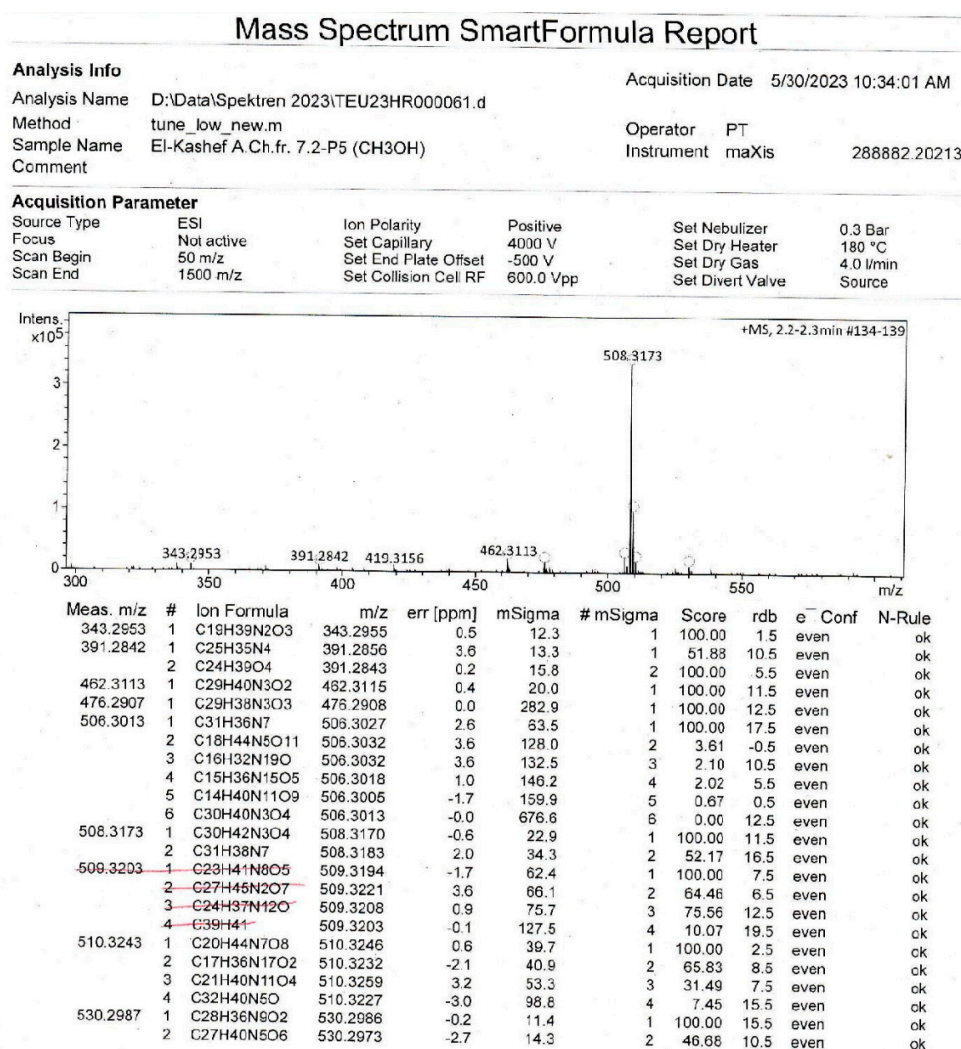

Figure S3.  $^1\text{H}$  NMR (600 MHz,  $\text{CDCl}_3$ ) spectrum of compound **1**.

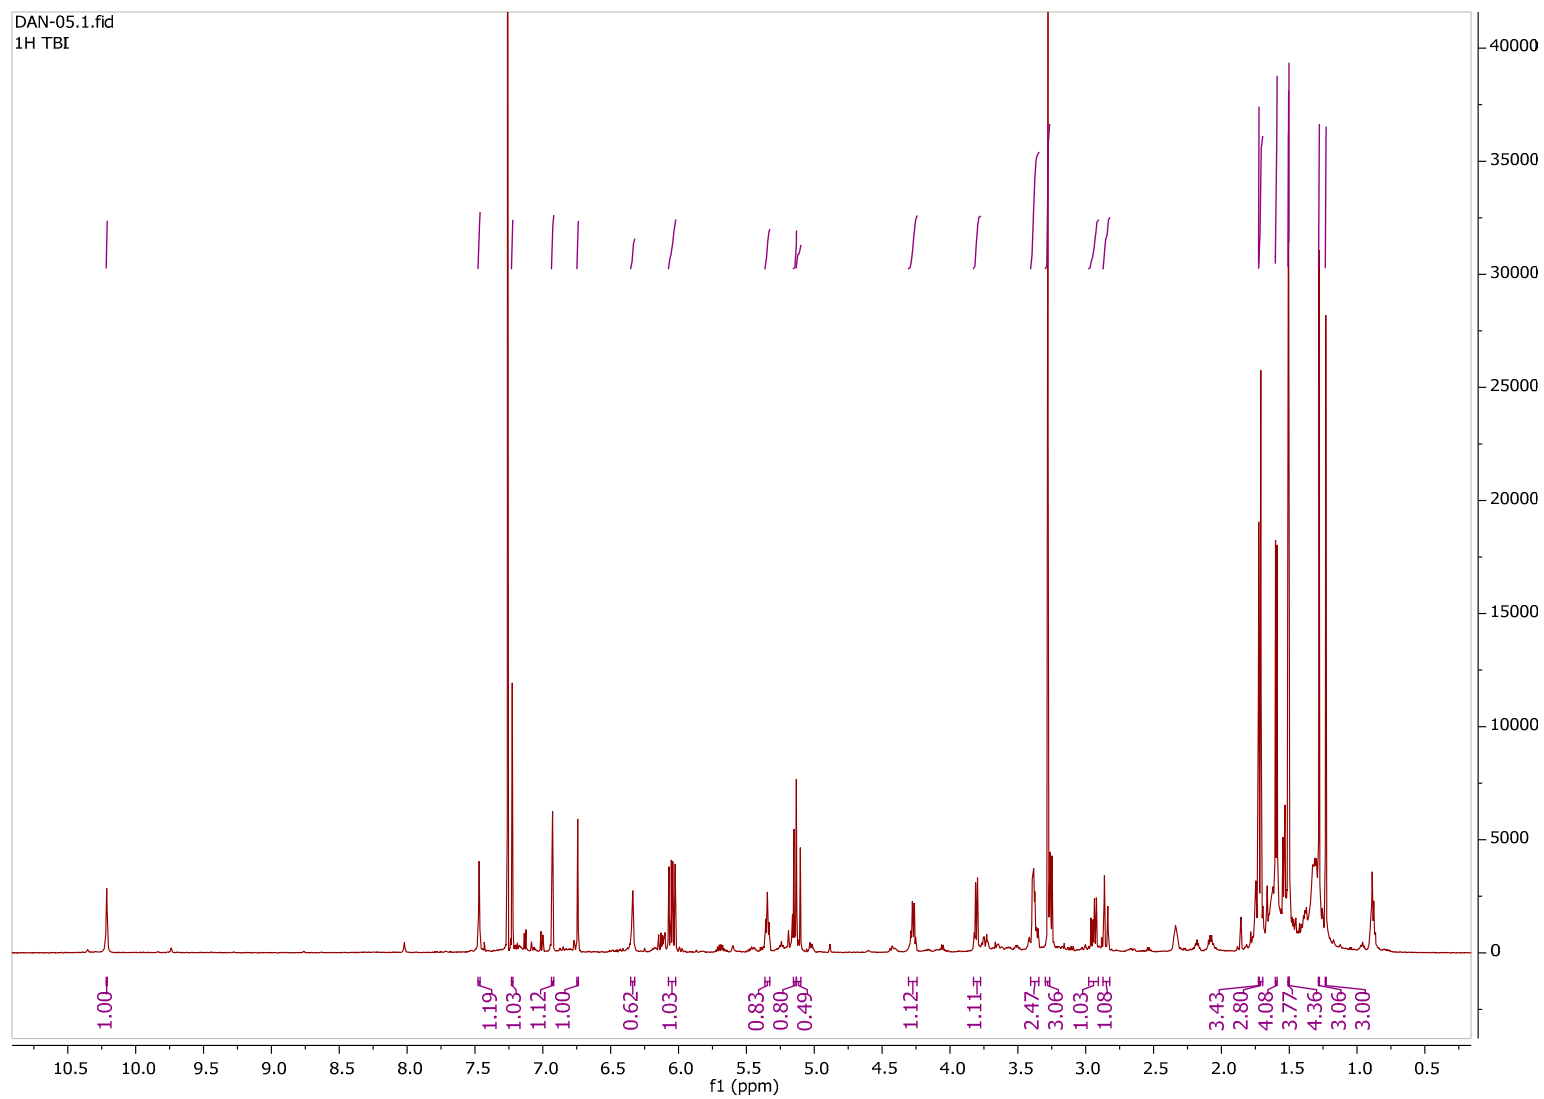

Figure S4. APT  $^{13}\text{C}$  NMR (150 MHz,  $\text{CDCl}_3$ ) spectrum of compound **1**.

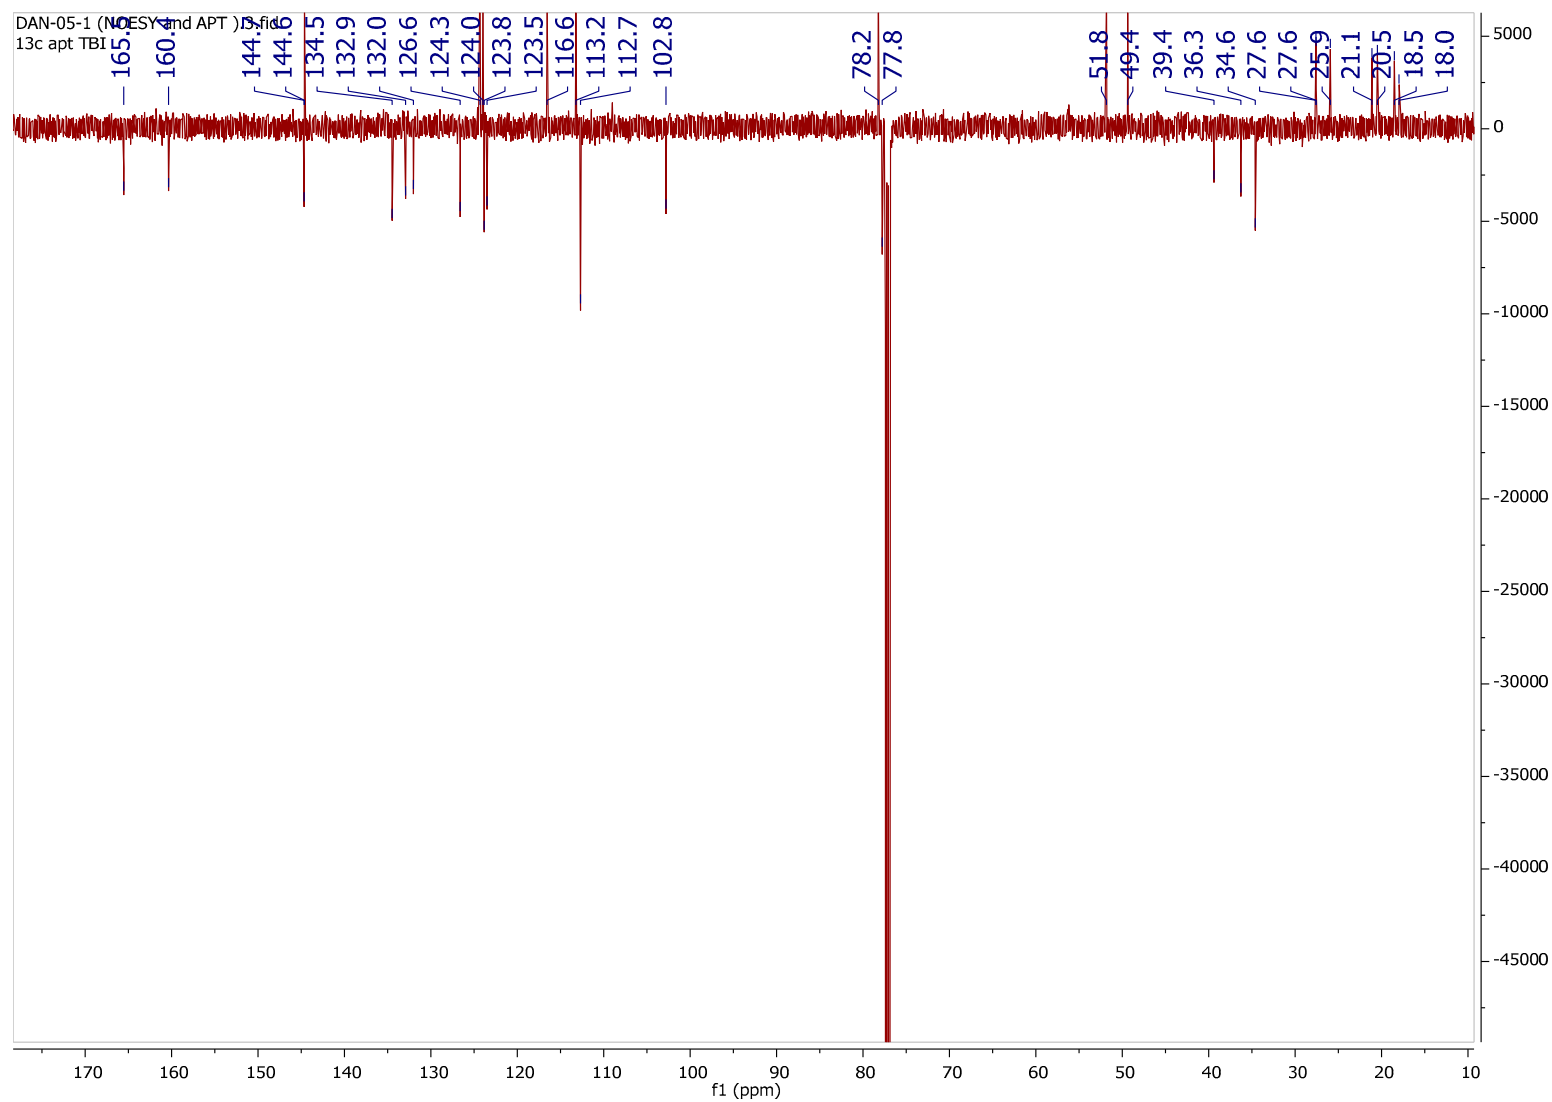

Figure S5. COSY (600 MHz, CDCl<sub>3</sub>) spectrum of compound 1.

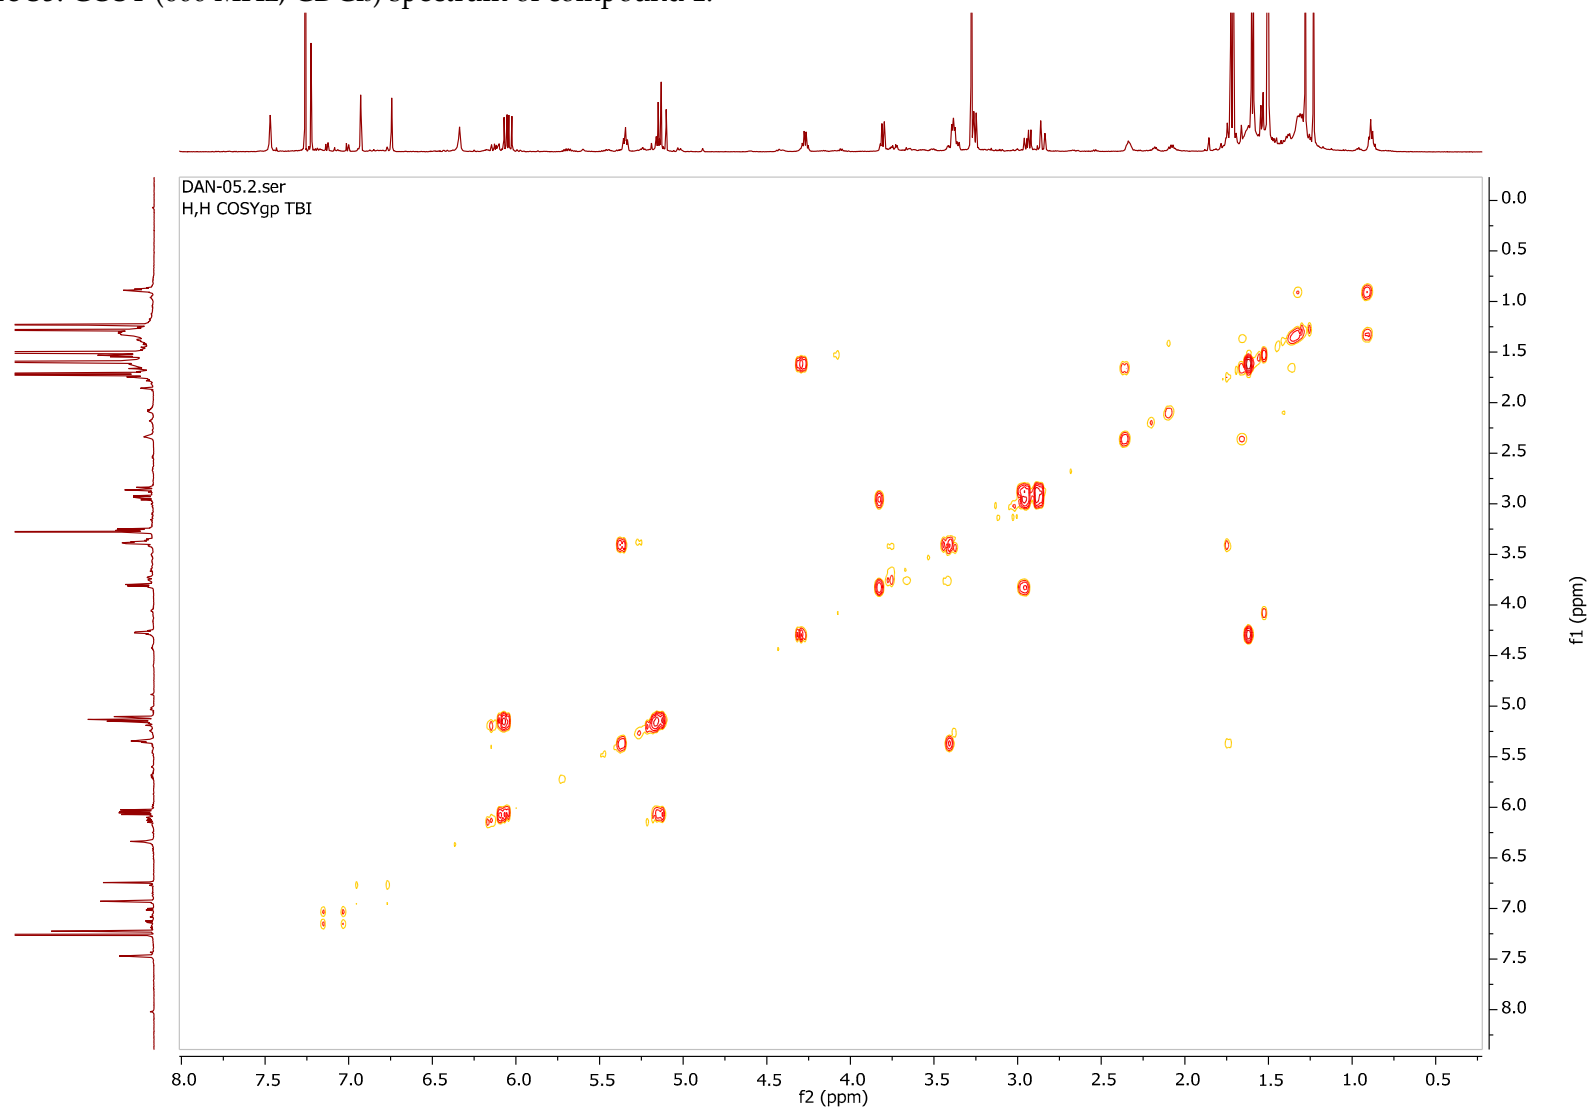

Figure S6. HSQC (600 MHz/150 MHz, CDCl<sub>3</sub>) spectrum of compound **1**.

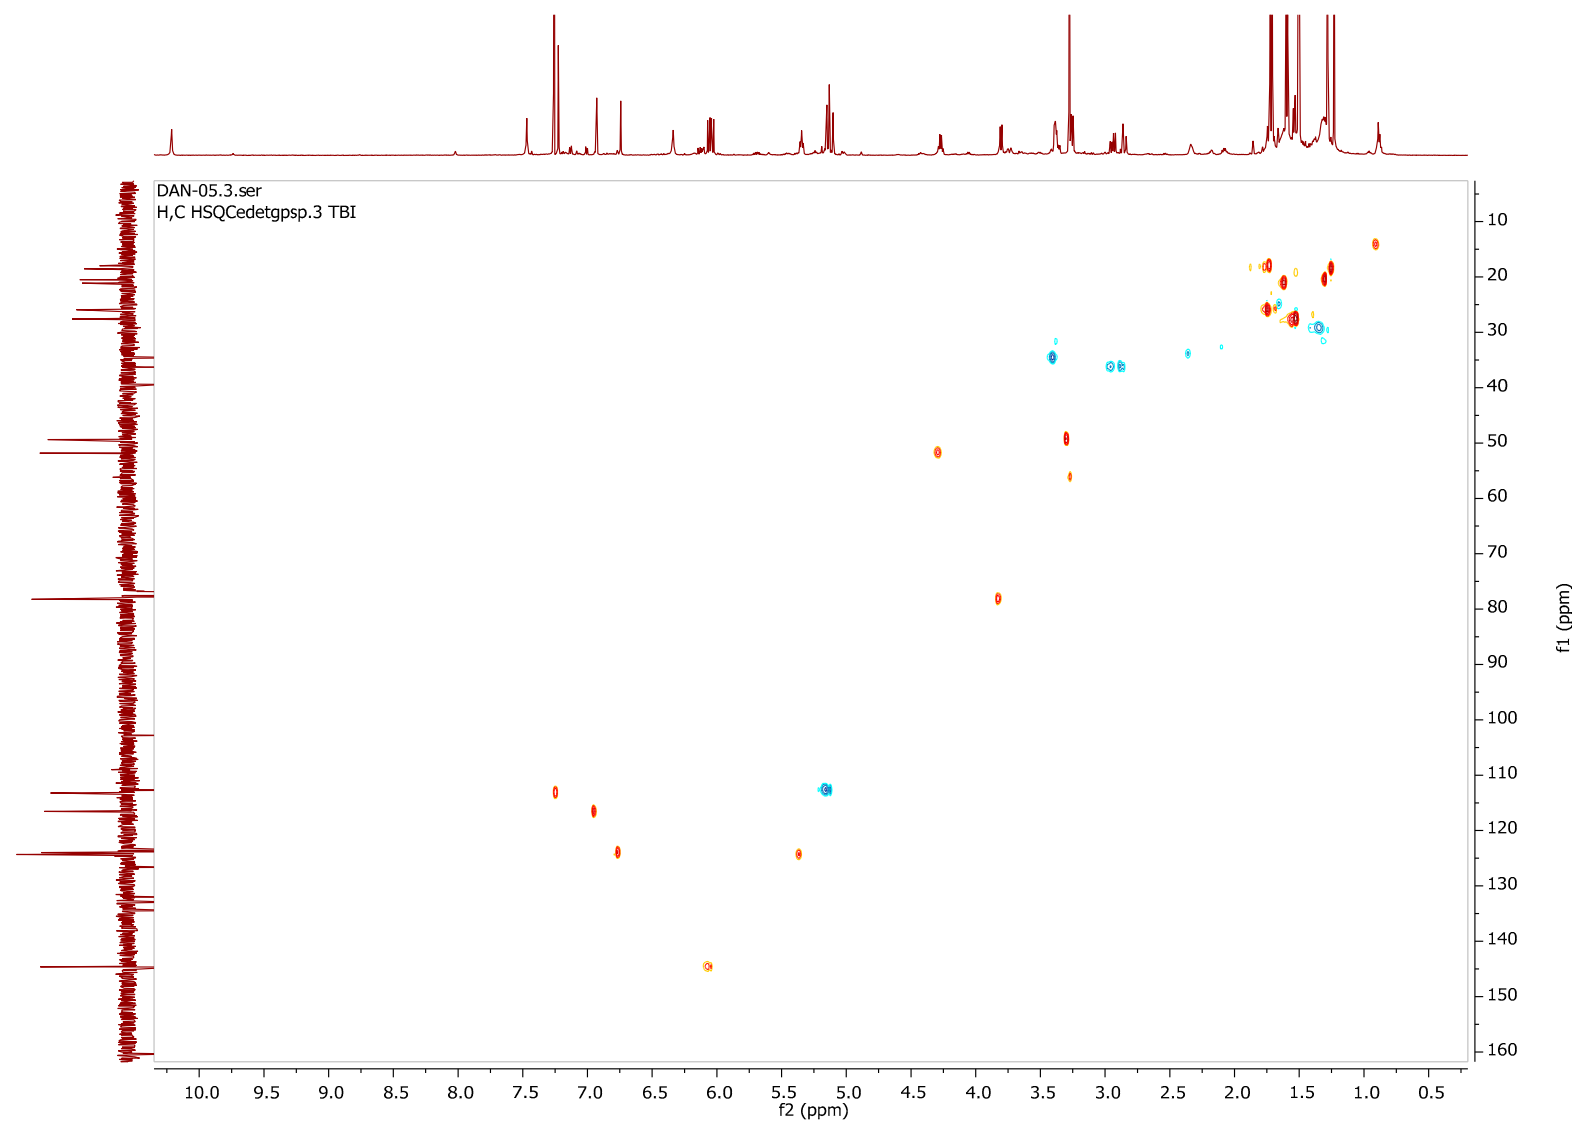

Figure S7. HMBC (600 MHz/150 MHz, CDCl<sub>3</sub>) spectrum of compound 1.

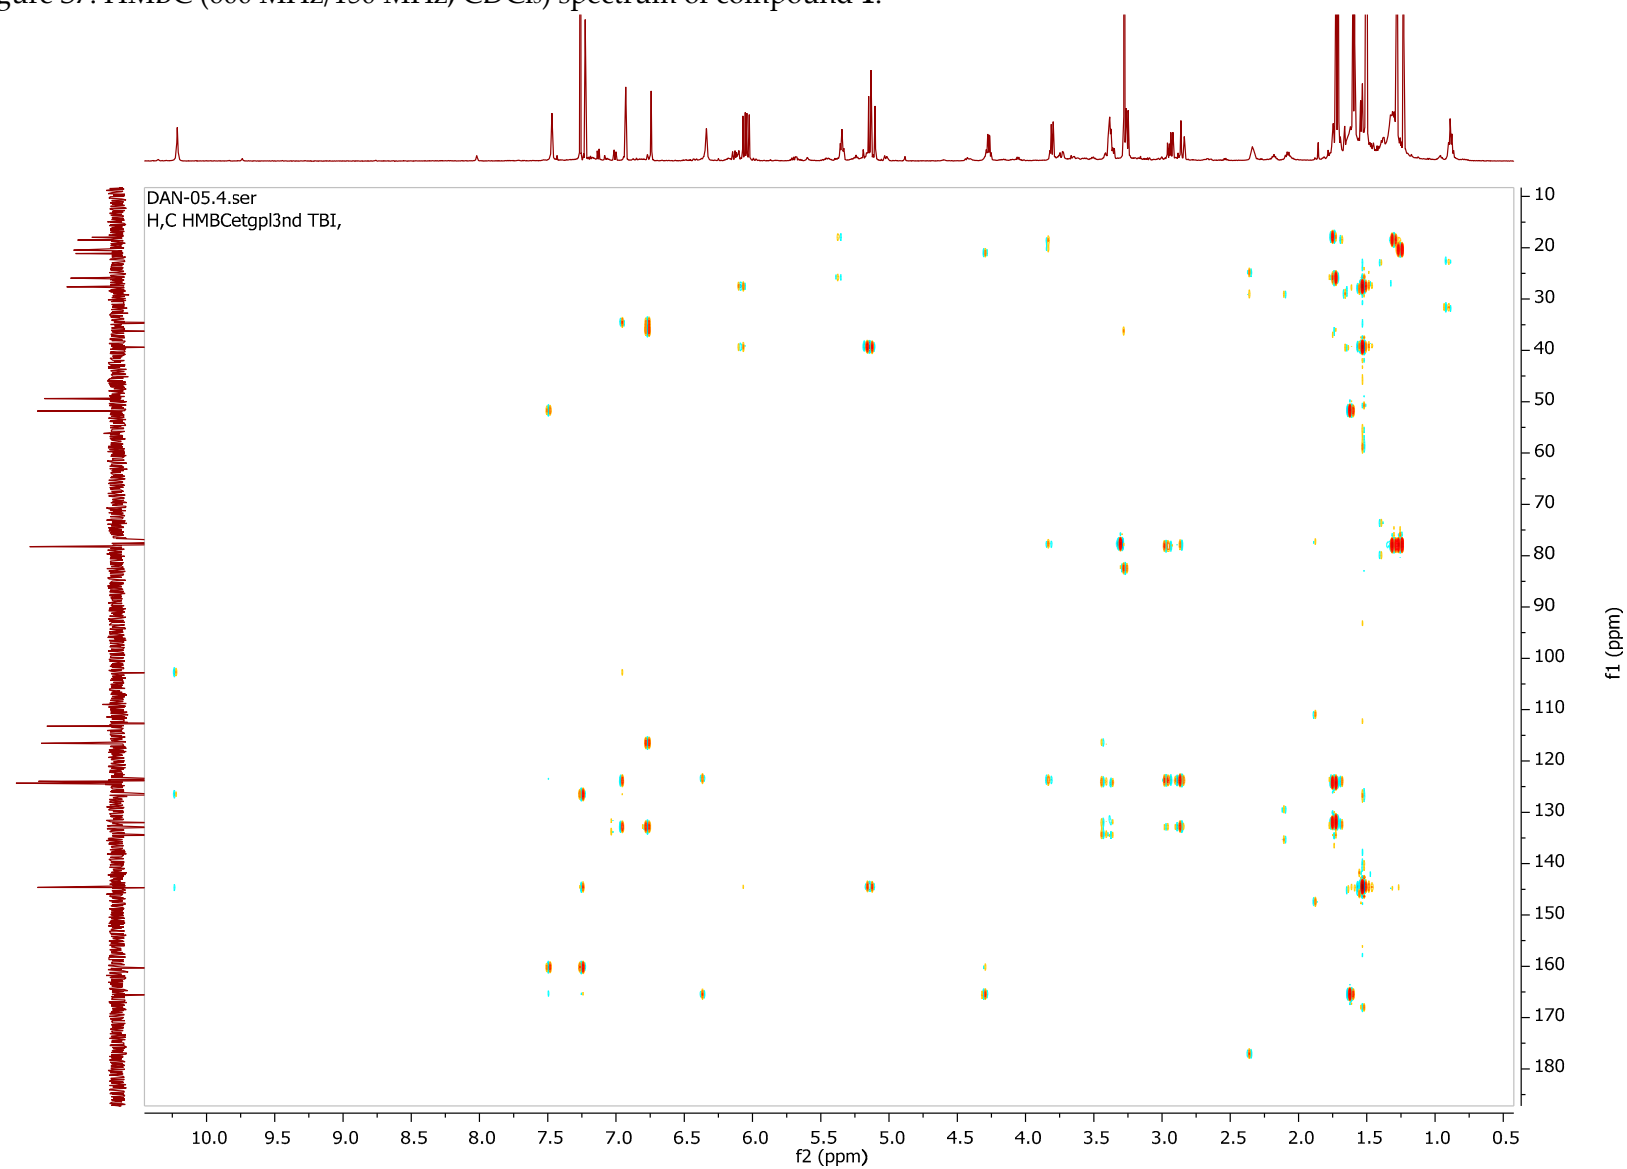

Figure S8. NOESY (600 MHz, CDCl<sub>3</sub>) spectrum of compound 1.

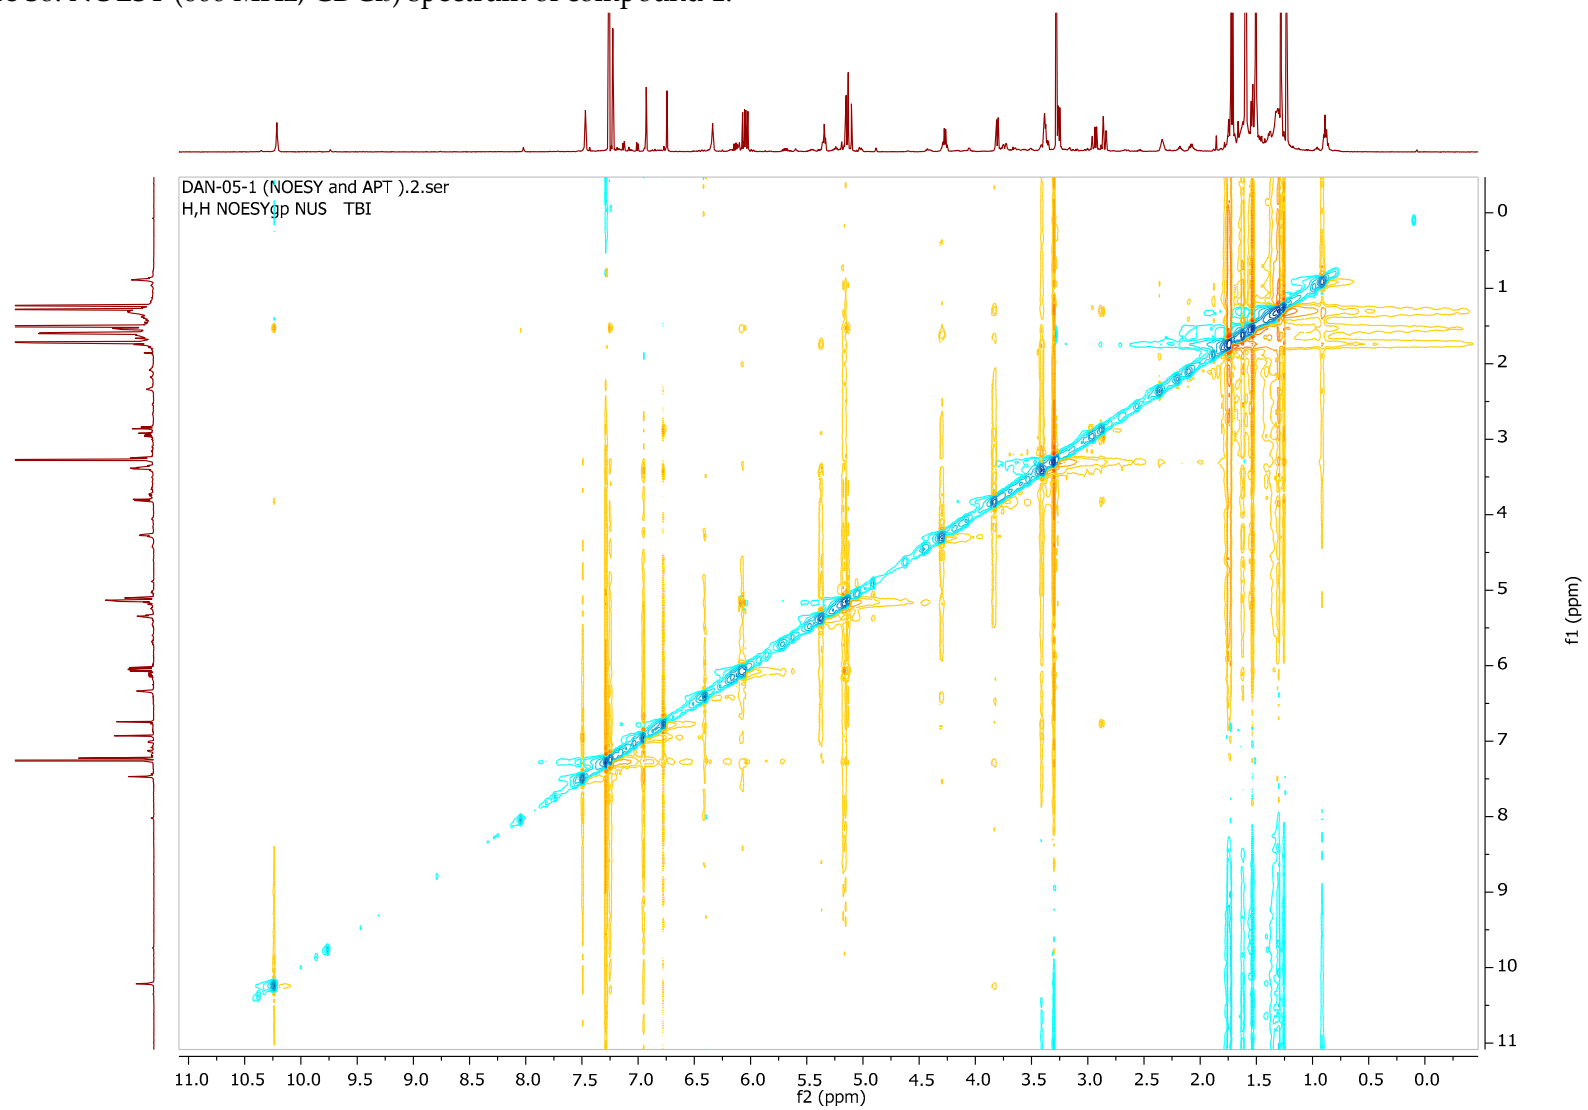

Table S1: Crystal data and refinement for compound **2**.*Crystal data*

|                                 |                                                         |
|---------------------------------|---------------------------------------------------------|
| $C_{25}H_{33}N_3O_4$            | $D_x = 1.231 \text{ Mg m}^{-3}$                         |
| $M_r = 439.54$                  | Cu $K\alpha$ radiation, $\lambda = 1.54184 \text{ \AA}$ |
| Orthorhombic, $P2_12_12_1$      | Cell parameters from 6819 reflections                   |
| $a = 6.0267 (1) \text{ \AA}$    | $\theta = 3.1\text{--}75.6^\circ$                       |
| $b = 19.1922 (5) \text{ \AA}$   | $\mu = 0.68 \text{ mm}^{-1}$                            |
| $c = 20.5108 (5) \text{ \AA}$   | $T = 302 \text{ K}$                                     |
| $V = 2372.39 (9) \text{ \AA}^3$ | Needle, clear colourless                                |
| $Z = 4$                         | $0.18 \times 0.04 \times 0.03 \text{ mm}$               |
| $F(000) = 944$                  | <b>CCDC deposition no. 2308479</b>                      |

*Data collection*

|                                                                                                                                                                                                                                                                                                                                                                                                                       |                                                                        |
|-----------------------------------------------------------------------------------------------------------------------------------------------------------------------------------------------------------------------------------------------------------------------------------------------------------------------------------------------------------------------------------------------------------------------|------------------------------------------------------------------------|
| XtaLAB Synergy, Dualflex, HyPix diffractometer                                                                                                                                                                                                                                                                                                                                                                        | 4755 independent reflections                                           |
| Radiation source: micro-focus sealed X-ray tube, PhotonJet (Cu) X-ray Source                                                                                                                                                                                                                                                                                                                                          | 3950 reflections with $I > 2\sigma(I)$                                 |
| Mirror monochromator                                                                                                                                                                                                                                                                                                                                                                                                  | $R_{\text{int}} = 0.057$                                               |
| Detector resolution: $10.0000 \text{ pixels mm}^{-1}$                                                                                                                                                                                                                                                                                                                                                                 | $\theta_{\text{max}} = 76.4^\circ$ , $\theta_{\text{min}} = 3.2^\circ$ |
| $\omega$ scans                                                                                                                                                                                                                                                                                                                                                                                                        | $h = -7 \rightarrow 4$                                                 |
| Absorption correction: analytical<br><i>CrysAlis PRO</i> 1.171.42.91a (Rigaku Oxford Diffraction, 2023) Analytical numeric absorption correction using a multifaceted crystal model based on expressions derived by R.C. Clark & J.S. Reid. (Clark, R. C. & Reid, J. S. (1995). Acta Cryst. A51, 887-897) Empirical absorption correction using spherical harmonics, implemented in SCALE3 ABSPACK scaling algorithm. | $k = -23 \rightarrow 24$                                               |
| $T_{\text{min}} = 0.998$ , $T_{\text{max}} = 0.999$                                                                                                                                                                                                                                                                                                                                                                   | $l = -25 \rightarrow 23$                                               |
| 15025 measured reflections                                                                                                                                                                                                                                                                                                                                                                                            |                                                                        |

*Refinement*

|                                 |                                                                                     |
|---------------------------------|-------------------------------------------------------------------------------------|
| Refinement on $F^2$             | Hydrogen site location: mixed                                                       |
| Least-squares matrix: full      | H atoms treated by a mixture of independent and constrained refinement              |
| $R[F^2 > 2\sigma(F^2)] = 0.047$ | $w = 1/[\sigma^2(F_o^2) + (0.0847P)^2 + 0.0358P]$<br>where $P = (F_o^2 + 2F_c^2)/3$ |
| $wR(F^2) = 0.132$               | $(\Delta/\sigma)_{\text{max}} < 0.001$                                              |
| $S = 1.03$                      | $\Delta_{\text{max}} = 0.21 \text{ e \AA}^{-3}$                                     |
| 4755 reflections                | $\Delta_{\text{min}} = -0.21 \text{ e \AA}^{-3}$                                    |
| 308 parameters                  | Absolute structure: Flack x determined using 1419                                   |

|                                  |                                                                                                                                                    |
|----------------------------------|----------------------------------------------------------------------------------------------------------------------------------------------------|
|                                  | quotients [(I <sup>+</sup> )-(I <sup>-</sup> )]/[(I <sup>+</sup> )+(I <sup>-</sup> )] (Parsons, Flack and Wagner, Acta Cryst. B69 (2013) 249-259). |
| 0 restraints                     | Absolute structure parameter: 0.08 (16)                                                                                                            |
| Primary atom site location: dual |                                                                                                                                                    |

Table S2. Fractional atomic coordinates and isotropic or equivalent isotropic displacement parameters (Å<sup>2</sup>) for Compound 2.

|      |             |              |              |             |
|------|-------------|--------------|--------------|-------------|
| N1   | 0.6920 (4)  | 0.43010 (12) | 0.64065 (11) | 0.0452 (5)  |
| O1   | -0.1655 (3) | 0.41347 (13) | 0.82832 (11) | 0.0626 (6)  |
| C2   | 0.5057 (4)  | 0.45595 (15) | 0.67234 (12) | 0.0443 (6)  |
| O2   | 0.5434 (3)  | 0.30001 (15) | 0.93856 (12) | 0.0711 (7)  |
| C3   | 0.4274 (4)  | 0.40504 (15) | 0.71386 (12) | 0.0442 (6)  |
| C3A  | 0.5705 (4)  | 0.34492 (14) | 0.70642 (12) | 0.0459 (6)  |
| O3   | 0.9767 (6)  | 0.27362 (14) | 0.49314 (13) | 0.0797 (7)  |
| C4   | 0.5747 (6)  | 0.27719 (17) | 0.73192 (15) | 0.0605 (8)  |
| H4   | 0.465673    | 0.262414     | 0.760865     | 0.073*      |
| O4   | 0.9752 (4)  | 0.46074 (13) | 0.50915 (12) | 0.0709 (6)  |
| C5   | 0.7422 (6)  | 0.23311 (18) | 0.71353 (16) | 0.0693 (9)  |
| H5   | 0.747372    | 0.188534     | 0.731249     | 0.083*      |
| C6   | 0.9050 (6)  | 0.25306 (18) | 0.66904 (15) | 0.0626 (8)  |
| H6   | 1.016957    | 0.221716     | 0.658385     | 0.075*      |
| C7   | 0.9045 (5)  | 0.31848 (15) | 0.64024 (13) | 0.0485 (6)  |
| C7A  | 0.7329 (4)  | 0.36268 (14) | 0.66053 (12) | 0.0446 (6)  |
| C8   | 0.2323 (4)  | 0.40736 (15) | 0.75631 (13) | 0.0471 (6)  |
| H8   | 0.105970    | 0.428071     | 0.738941     | 0.056*      |
| C9   | 0.2151 (4)  | 0.38324 (15) | 0.81686 (13) | 0.0438 (6)  |
| C10  | -0.0029 (4) | 0.38180 (16) | 0.85016 (14) | 0.0479 (6)  |
| N11  | -0.0142 (4) | 0.34543 (15) | 0.90600 (12) | 0.0533 (6)  |
| C12  | 0.1519 (4)  | 0.29439 (17) | 0.92553 (14) | 0.0504 (7)  |
| H12  | 0.147277    | 0.290637     | 0.973158     | 0.060*      |
| C13  | 0.3811 (4)  | 0.31885 (17) | 0.90667 (14) | 0.0505 (7)  |
| N14  | 0.3975 (4)  | 0.35924 (14) | 0.85399 (11) | 0.0473 (5)  |
| H14  | 0.527 (6)   | 0.373 (2)    | 0.8419 (17)  | 0.061 (10)* |
| H3   | 1.120 (9)   | 0.266 (3)    | 0.490 (2)    | 0.091*      |
| C15  | 0.4423 (5)  | 0.53139 (16) | 0.66059 (15) | 0.0528 (7)  |
| C19  | 0.1976 (6)  | 0.5450 (2)   | 0.6739 (3)   | 0.0896 (14) |
| H19A | 0.108958    | 0.515081     | 0.646929     | 0.134*      |

|      |             |              |              |             |
|------|-------------|--------------|--------------|-------------|
| H19B | 0.163676    | 0.592767     | 0.664225     | 0.134*      |
| H19C | 0.165990    | 0.535749     | 0.718950     | 0.134*      |
| C18  | 0.4861 (9)  | 0.5515 (2)   | 0.58863 (19) | 0.0917 (14) |
| H18A | 0.641868    | 0.547726     | 0.579513     | 0.138*      |
| H18B | 0.438418    | 0.598588     | 0.581280     | 0.138*      |
| H18C | 0.405119    | 0.520691     | 0.560468     | 0.138*      |
| C16  | 0.5736 (6)  | 0.58073 (19) | 0.7017 (2)   | 0.0713 (9)  |
| H16  | 0.556226    | 0.627650     | 0.691577     | 0.086*      |
| C17  | 0.7054 (8)  | 0.5679 (3)   | 0.7485 (2)   | 0.0887 (12) |
| H17A | 0.730780    | 0.522052     | 0.761242     | 0.106*      |
| H17B | 0.776619    | 0.604219     | 0.769906     | 0.106*      |
| C20  | 0.1033 (7)  | 0.2233 (2)   | 0.8978 (2)   | 0.0841 (12) |
| H20A | -0.039426   | 0.207851     | 0.912703     | 0.126*      |
| H20B | 0.215115    | 0.191041     | 0.911977     | 0.126*      |
| H20C | 0.103403    | 0.225702     | 0.851047     | 0.126*      |
| C21  | 1.0640 (5)  | 0.34213 (16) | 0.58915 (13) | 0.0510 (6)  |
| H21A | 1.193512    | 0.312132     | 0.589677     | 0.061*      |
| H21B | 1.112382    | 0.389161     | 0.599022     | 0.061*      |
| C22  | 0.9602 (5)  | 0.34074 (16) | 0.52133 (14) | 0.0536 (7)  |
| H22  | 0.801375    | 0.349419     | 0.527633     | 0.064*      |
| C23  | 1.0431 (5)  | 0.3981 (2)   | 0.47509 (15) | 0.0618 (8)  |
| C24  | 1.2949 (6)  | 0.3965 (2)   | 0.4668 (2)   | 0.0745 (10) |
| H24A | 1.339837    | 0.433495     | 0.438213     | 0.112*      |
| H24B | 1.338340    | 0.352537     | 0.448359     | 0.112*      |
| H24C | 1.364693    | 0.402300     | 0.508472     | 0.112*      |
| C25  | 0.9277 (8)  | 0.3909 (3)   | 0.40979 (18) | 0.0964 (15) |
| H25A | 0.769935    | 0.391959     | 0.416103     | 0.145*      |
| H25B | 0.969269    | 0.347521     | 0.389982     | 0.145*      |
| H25C | 0.970922    | 0.428745     | 0.381908     | 0.145*      |
| C26  | 0.9967 (9)  | 0.5252 (3)   | 0.4747 (3)   | 0.1006 (15) |
| H26A | 0.883027    | 0.528295     | 0.442090     | 0.151*      |
| H26B | 1.139797    | 0.527288     | 0.454283     | 0.151*      |
| H26C | 0.981694    | 0.563267     | 0.504783     | 0.151*      |
| H1   | 0.769 (12)  | 0.452 (4)    | 0.607 (3)    | 0.151*      |
| H11  | -0.154 (13) | 0.338 (4)    | 0.923 (3)    | 0.151*      |

Table S3. Atomic displacement parameters ( $\text{\AA}^2$ ) for compound **2**.

|     | $U^{11}$    | $U^{22}$    | $U^{33}$    | $U^{12}$     | $U^{13}$     | $U^{23}$     |
|-----|-------------|-------------|-------------|--------------|--------------|--------------|
| N1  | 0.0447 (12) | 0.0460 (12) | 0.0450 (11) | 0.0016 (9)   | 0.0073 (9)   | 0.0037 (9)   |
| O1  | 0.0327 (10) | 0.0846 (16) | 0.0704 (13) | 0.0065 (9)   | 0.0037 (8)   | 0.0218 (12)  |
| C2  | 0.0402 (13) | 0.0501 (14) | 0.0427 (12) | 0.0016 (11)  | 0.0019 (10)  | 0.0009 (11)  |
| O2  | 0.0359 (10) | 0.107 (2)   | 0.0707 (13) | 0.0043 (10)  | -0.0002 (9)  | 0.0359 (13)  |
| C3  | 0.0394 (13) | 0.0537 (14) | 0.0394 (12) | -0.0007 (11) | -0.0009 (10) | 0.0014 (11)  |
| C3A | 0.0489 (14) | 0.0491 (14) | 0.0396 (12) | 0.0004 (11)  | 0.0020 (10)  | 0.0044 (11)  |
| O3  | 0.0989 (18) | 0.0689 (16) | 0.0714 (14) | -0.0142 (14) | 0.0113 (14)  | -0.0217 (13) |
| C4  | 0.075 (2)   | 0.0563 (17) | 0.0500 (15) | 0.0014 (15)  | 0.0130 (14)  | 0.0083 (13)  |
| O4  | 0.0770 (15) | 0.0627 (14) | 0.0729 (14) | 0.0099 (12)  | 0.0146 (12)  | 0.0180 (12)  |
| C5  | 0.097 (3)   | 0.0508 (17) | 0.0601 (17) | 0.0110 (16)  | 0.0139 (18)  | 0.0136 (14)  |
| C6  | 0.078 (2)   | 0.0554 (18) | 0.0546 (16) | 0.0176 (15)  | 0.0080 (15)  | 0.0044 (13)  |
| C7  | 0.0507 (14) | 0.0512 (16) | 0.0435 (13) | 0.0046 (12)  | -0.0007 (11) | 0.0004 (12)  |
| C7A | 0.0462 (14) | 0.0469 (14) | 0.0407 (12) | 0.0012 (11)  | 0.0026 (10)  | 0.0025 (10)  |
| C8  | 0.0364 (12) | 0.0579 (16) | 0.0469 (14) | -0.0013 (11) | -0.0010 (10) | 0.0013 (12)  |
| C9  | 0.0306 (12) | 0.0551 (15) | 0.0456 (14) | -0.0014 (10) | -0.0007 (10) | -0.0003 (11) |
| C10 | 0.0324 (12) | 0.0612 (16) | 0.0501 (14) | -0.0017 (11) | 0.0004 (10)  | 0.0019 (12)  |
| N11 | 0.0312 (11) | 0.0767 (17) | 0.0520 (12) | 0.0040 (10)  | 0.0080 (9)   | 0.0105 (12)  |
| C12 | 0.0361 (13) | 0.0669 (19) | 0.0482 (14) | -0.0004 (11) | 0.0034 (10)  | 0.0081 (13)  |
| C13 | 0.0348 (13) | 0.0686 (19) | 0.0480 (14) | 0.0026 (11)  | 0.0013 (10)  | 0.0052 (13)  |
| N14 | 0.0281 (10) | 0.0706 (16) | 0.0433 (11) | -0.0013 (9)  | 0.0037 (8)   | 0.0067 (11)  |
| C15 | 0.0450 (15) | 0.0494 (15) | 0.0641 (16) | 0.0043 (11)  | 0.0030 (12)  | 0.0023 (13)  |
| C19 | 0.0466 (18) | 0.060 (2)   | 0.162 (4)   | 0.0086 (15)  | 0.003 (2)    | 0.022 (2)    |
| C18 | 0.140 (4)   | 0.057 (2)   | 0.077 (2)   | 0.021 (2)    | 0.008 (3)    | 0.0134 (18)  |
| C16 | 0.070 (2)   | 0.062 (2)   | 0.083 (2)   | 0.0018 (16)  | 0.0110 (19)  | -0.0110 (18) |
| C17 | 0.090 (3)   | 0.095 (3)   | 0.080 (3)   | -0.007 (2)   | 0.002 (2)    | -0.017 (2)   |
| C20 | 0.071 (2)   | 0.068 (2)   | 0.113 (3)   | -0.0082 (18) | 0.017 (2)    | -0.002 (2)   |
| C21 | 0.0456 (15) | 0.0564 (16) | 0.0512 (14) | 0.0073 (12)  | 0.0043 (12)  | -0.0006 (12) |
| C22 | 0.0491 (15) | 0.0612 (18) | 0.0504 (14) | -0.0054 (12) | 0.0051 (12)  | -0.0063 (13) |
| C23 | 0.0575 (17) | 0.078 (2)   | 0.0497 (15) | -0.0002 (15) | 0.0086 (13)  | 0.0055 (14)  |
| C24 | 0.0594 (19) | 0.083 (2)   | 0.082 (2)   | -0.0029 (18) | 0.0231 (17)  | 0.0072 (19)  |
| C25 | 0.091 (3)   | 0.148 (5)   | 0.0502 (19) | -0.010 (3)   | 0.0010 (18)  | 0.018 (2)    |
| C26 | 0.103 (3)   | 0.085 (3)   | 0.114 (3)   | 0.011 (2)    | 0.006 (3)    | 0.045 (3)    |

Table S4. Geometric parameters ( $\text{\AA}$ ,  $^\circ$ ) for compound **2**.

|       |           |         |          |
|-------|-----------|---------|----------|
| N1—C2 | 1.389 (3) | N14—H14 | 0.86 (4) |
|-------|-----------|---------|----------|

|           |           |               |           |
|-----------|-----------|---------------|-----------|
| N1—C7A    | 1.379 (4) | C15—C19       | 1.522 (4) |
| N1—H1     | 0.92 (7)  | C15—C18       | 1.548 (5) |
| O1—C10    | 1.237 (3) | C15—C16       | 1.495 (5) |
| C2—C3     | 1.379 (4) | C19—H19A      | 0.9600    |
| C2—C15    | 1.517 (4) | C19—H19B      | 0.9600    |
| O2—C13    | 1.231 (3) | C19—H19C      | 0.9600    |
| C3—C3A    | 1.449 (4) | C18—H18A      | 0.9600    |
| C3—C8     | 1.463 (4) | C18—H18B      | 0.9600    |
| C3A—C4    | 1.401 (4) | C18—H18C      | 0.9600    |
| C3A—C7A   | 1.400 (4) | C16—H16       | 0.9300    |
| O3—H3     | 0.88 (5)  | C16—C17       | 1.269 (6) |
| O3—C22    | 1.415 (4) | C17—H17A      | 0.9300    |
| C4—H4     | 0.9300    | C17—H17B      | 0.9300    |
| C4—C5     | 1.370 (5) | C20—H20A      | 0.9600    |
| O4—C23    | 1.449 (4) | C20—H20B      | 0.9600    |
| O4—C26    | 1.430 (5) | C20—H20C      | 0.9600    |
| C5—H5     | 0.9300    | C21—H21A      | 0.9700    |
| C5—C6     | 1.394 (5) | C21—H21B      | 0.9700    |
| C6—H6     | 0.9300    | C21—C22       | 1.525 (4) |
| C6—C7     | 1.388 (4) | C22—H22       | 0.9800    |
| C7—C7A    | 1.401 (4) | C22—C23       | 1.537 (4) |
| C7—C21    | 1.493 (4) | C23—C24       | 1.527 (5) |
| C8—H8     | 0.9300    | C23—C25       | 1.515 (5) |
| C8—C9     | 1.329 (4) | C24—H24A      | 0.9600    |
| C9—C10    | 1.481 (4) | C24—H24B      | 0.9600    |
| C9—N14    | 1.415 (3) | C24—H24C      | 0.9600    |
| C10—N11   | 1.343 (4) | C25—H25A      | 0.9600    |
| N11—C12   | 1.457 (4) | C25—H25B      | 0.9600    |
| N11—H11   | 0.92 (8)  | C25—H25C      | 0.9600    |
| C12—H12   | 0.9800    | C26—H26A      | 0.9600    |
| C12—C13   | 1.510 (4) | C26—H26B      | 0.9600    |
| C12—C20   | 1.507 (5) | C26—H26C      | 0.9600    |
| C13—N14   | 1.333 (4) |               |           |
|           |           |               |           |
| C2—N1—H1  | 126 (4)   | C15—C19—H19B  | 109.5     |
| C7A—N1—C2 | 110.0 (2) | C15—C19—H19C  | 109.5     |
| C7A—N1—H1 | 123 (4)   | H19A—C19—H19B | 109.5     |

|             |           |               |           |
|-------------|-----------|---------------|-----------|
| N1—C2—C15   | 118.0 (2) | H19A—C19—H19C | 109.5     |
| C3—C2—N1    | 108.2 (2) | H19B—C19—H19C | 109.5     |
| C3—C2—C15   | 133.5 (2) | C15—C18—H18A  | 109.5     |
| C2—C3—C3A   | 107.2 (2) | C15—C18—H18B  | 109.5     |
| C2—C3—C8    | 128.4 (3) | C15—C18—H18C  | 109.5     |
| C3A—C3—C8   | 124.4 (2) | H18A—C18—H18B | 109.5     |
| C4—C3A—C3   | 135.3 (3) | H18A—C18—H18C | 109.5     |
| C7A—C3A—C3  | 107.0 (2) | H18B—C18—H18C | 109.5     |
| C7A—C3A—C4  | 117.6 (3) | C15—C16—H16   | 115.3     |
| C22—O3—H3   | 104 (3)   | C17—C16—C15   | 129.3 (4) |
| C3A—C4—H4   | 120.5     | C17—C16—H16   | 115.3     |
| C5—C4—C3A   | 118.9 (3) | C16—C17—H17A  | 120.0     |
| C5—C4—H4    | 120.5     | C16—C17—H17B  | 120.0     |
| C26—O4—C23  | 117.0 (3) | H17A—C17—H17B | 120.0     |
| C4—C5—H5    | 119.0     | C12—C20—H20A  | 109.5     |
| C4—C5—C6    | 122.0 (3) | C12—C20—H20B  | 109.5     |
| C6—C5—H5    | 119.0     | C12—C20—H20C  | 109.5     |
| C5—C6—H6    | 119.1     | H20A—C20—H20B | 109.5     |
| C7—C6—C5    | 121.7 (3) | H20A—C20—H20C | 109.5     |
| C7—C6—H6    | 119.1     | H20B—C20—H20C | 109.5     |
| C6—C7—C7A   | 115.0 (3) | C7—C21—H21A   | 109.3     |
| C6—C7—C21   | 124.9 (3) | C7—C21—H21B   | 109.3     |
| C7A—C7—C21  | 120.0 (3) | C7—C21—C22    | 111.8 (2) |
| N1—C7A—C3A  | 107.6 (2) | H21A—C21—H21B | 107.9     |
| N1—C7A—C7   | 127.8 (2) | C22—C21—H21A  | 109.3     |
| C3A—C7A—C7  | 124.6 (3) | C22—C21—H21B  | 109.3     |
| C3—C8—H8    | 116.3     | O3—C22—C21    | 111.1 (3) |
| C9—C8—C3    | 127.4 (2) | O3—C22—H22    | 106.1     |
| C9—C8—H8    | 116.3     | O3—C22—C23    | 112.2 (3) |
| C8—C9—C10   | 120.5 (2) | C21—C22—H22   | 106.1     |
| C8—C9—N14   | 123.7 (2) | C21—C22—C23   | 114.6 (3) |
| N14—C9—C10  | 115.8 (2) | C23—C22—H22   | 106.1     |
| O1—C10—C9   | 121.8 (2) | O4—C23—C22    | 101.8 (2) |
| O1—C10—N11  | 121.6 (2) | O4—C23—C24    | 110.6 (3) |
| N11—C10—C9  | 116.6 (2) | O4—C23—C25    | 111.8 (3) |
| C10—N11—C12 | 123.3 (2) | C24—C23—C22   | 112.2 (3) |
| C10—N11—H11 | 116 (4)   | C25—C23—C22   | 109.3 (3) |

|                |            |                 |            |
|----------------|------------|-----------------|------------|
| C12—N11—H11    | 115 (4)    | C25—C23—C24     | 110.8 (3)  |
| N11—C12—H12    | 107.7      | C23—C24—H24A    | 109.5      |
| N11—C12—C13    | 110.4 (2)  | C23—C24—H24B    | 109.5      |
| N11—C12—C20    | 111.8 (3)  | C23—C24—H24C    | 109.5      |
| C13—C12—H12    | 107.7      | H24A—C24—H24B   | 109.5      |
| C20—C12—H12    | 107.7      | H24A—C24—H24C   | 109.5      |
| C20—C12—C13    | 111.3 (3)  | H24B—C24—H24C   | 109.5      |
| O2—C13—C12     | 120.0 (2)  | C23—C25—H25A    | 109.5      |
| O2—C13—N14     | 122.9 (3)  | C23—C25—H25B    | 109.5      |
| N14—C13—C12    | 117.1 (2)  | C23—C25—H25C    | 109.5      |
| C9—N14—H14     | 117 (2)    | H25A—C25—H25B   | 109.5      |
| C13—N14—C9     | 124.6 (2)  | H25A—C25—H25C   | 109.5      |
| C13—N14—H14    | 119 (2)    | H25B—C25—H25C   | 109.5      |
| C2—C15—C19     | 112.3 (3)  | O4—C26—H26A     | 109.5      |
| C2—C15—C18     | 110.3 (3)  | O4—C26—H26B     | 109.5      |
| C19—C15—C18    | 107.0 (3)  | O4—C26—H26C     | 109.5      |
| C16—C15—C2     | 112.5 (3)  | H26A—C26—H26B   | 109.5      |
| C16—C15—C19    | 107.6 (3)  | H26A—C26—H26C   | 109.5      |
| C16—C15—C18    | 106.8 (3)  | H26B—C26—H26C   | 109.5      |
| C15—C19—H19A   | 109.5      |                 |            |
|                |            |                 |            |
| N1—C2—C3—C3A   | -0.9 (3)   | C7—C21—C22—O3   | -84.8 (3)  |
| N1—C2—C3—C8    | -178.5 (2) | C7—C21—C22—C23  | 146.7 (3)  |
| N1—C2—C15—C19  | 156.7 (3)  | C7A—N1—C2—C3    | 0.9 (3)    |
| N1—C2—C15—C18  | 37.4 (4)   | C7A—N1—C2—C15   | 175.8 (2)  |
| N1—C2—C15—C16  | -81.7 (3)  | C7A—C3A—C4—C5   | 3.2 (5)    |
| O1—C10—N11—C12 | 164.7 (3)  | C7A—C7—C21—C22  | -75.1 (3)  |
| C2—N1—C7A—C3A  | -0.5 (3)   | C8—C3—C3A—C4    | 0.9 (5)    |
| C2—N1—C7A—C7   | -180.0 (3) | C8—C3—C3A—C7A   | 178.3 (2)  |
| C2—C3—C3A—C4   | -176.8 (3) | C8—C9—C10—O1    | -13.0 (5)  |
| C2—C3—C3A—C7A  | 0.6 (3)    | C8—C9—C10—N11   | 168.2 (3)  |
| C2—C3—C8—C9    | -139.4 (3) | C8—C9—N14—C13   | -161.7 (3) |
| C2—C15—C16—C17 | -9.1 (5)   | C9—C10—N11—C12  | -16.6 (4)  |
| O2—C13—N14—C9  | -178.6 (3) | C10—C9—N14—C13  | 19.8 (4)   |
| C3—C2—C15—C19  | -30.0 (5)  | C10—N11—C12—C13 | 37.8 (4)   |
| C3—C2—C15—C18  | -149.3 (3) | C10—N11—C12—C20 | -86.6 (4)  |
| C3—C2—C15—C16  | 91.6 (4)   | N11—C12—C13—O2  | 151.8 (3)  |

|                |            |                 |            |
|----------------|------------|-----------------|------------|
| C3—C3A—C4—C5   | -179.6 (3) | N11—C12—C13—N14 | -30.0 (4)  |
| C3—C3A—C7A—N1  | -0.1 (3)   | C12—C13—N14—C9  | 3.2 (4)    |
| C3—C3A—C7A—C7  | 179.4 (3)  | N14—C9—C10—O1   | 165.6 (3)  |
| C3—C8—C9—C10   | -172.3 (3) | N14—C9—C10—N11  | -13.1 (4)  |
| C3—C8—C9—N14   | 9.2 (5)    | C15—C2—C3—C3A   | -174.7 (3) |
| C3A—C3—C8—C9   | 43.4 (4)   | C15—C2—C3—C8    | 7.7 (5)    |
| C3A—C4—C5—C6   | -1.6 (5)   | C19—C15—C16—C17 | 115.1 (5)  |
| O3—C22—C23—O4  | 170.6 (3)  | C18—C15—C16—C17 | -130.3 (4) |
| O3—C22—C23—C24 | -71.2 (4)  | C20—C12—C13—O2  | -83.4 (4)  |
| O3—C22—C23—C25 | 52.1 (4)   | C20—C12—C13—N14 | 94.8 (4)   |
| C4—C3A—C7A—N1  | 177.8 (3)  | C21—C7—C7A—N1   | -2.8 (4)   |
| C4—C3A—C7A—C7  | -2.7 (4)   | C21—C7—C7A—C3A  | 177.8 (3)  |
| C4—C5—C6—C7    | -0.9 (6)   | C21—C22—C23—O4  | -61.6 (3)  |
| C5—C6—C7—C7A   | 1.6 (5)    | C21—C22—C23—C24 | 56.7 (4)   |
| C5—C6—C7—C21   | -175.9 (3) | C21—C22—C23—C25 | 180.0 (3)  |
| C6—C7—C7A—N1   | 179.7 (3)  | C26—O4—C23—C22  | -170.8 (3) |
| C6—C7—C7A—C3A  | 0.2 (4)    | C26—O4—C23—C24  | 69.9 (4)   |
| C6—C7—C21—C22  | 102.2 (4)  | C26—O4—C23—C25  | -54.1 (4)  |

Table S5. Hydrogen-bond geometry (Å, °) for compound 2.

| Nr Donor --- H...Acceptor [ ARU ] | D - H   | H...A   | D...A    | D - H...A |
|-----------------------------------|---------|---------|----------|-----------|
| 1 Intra 1 N1--H1 O4 [ ]           | 0.93(7) | 2.37(6) | 3.246(3) | 157(6)    |
| 2 1 O3--H3 O3 [ 3556.01]          | 0.88(5) | 2.31(5) | 3.159(5) | 164(4)    |
| 3 1 N11--H11 O2 [ 1455.01]        | 0.92(8) | 1.99(8) | 2.884(3) | 163(7)    |
| 4 1 N14--H14 O1 [ 1655.01]        | 0.86(4) | 2.03(4) | 2.880(3) | 170(3)    |
| 5 Intra 1 C8--H8 O1 [ ]           | 0.93    | 2.47    | 2.818(3) | 102       |
| 6 1 C12--H12 O2 [ 3457.01]        | 0.98    | 2.59    | 3.388(4) | 139       |
| 7 1 C17--H17A O1 [ 1655.01]       | 0.93    | 2.57    | 3.474(6) | 163       |
| 8 Intra 1 C21--H21B O4 [ ]        | 0.97    | 2.44    | 2.857(4) | 105       |

Translation of ARU-Code to CIF and Equivalent Position Code

[ 1455.] = ii = -1+x, y, z  
[ 1655.] = i = 1+x, y, z  
[ 3556.] = iii = 1/2+x, 1/2-y, 1-z  
[ 3457.] = -1/2+x, 1/2-y, 2-z

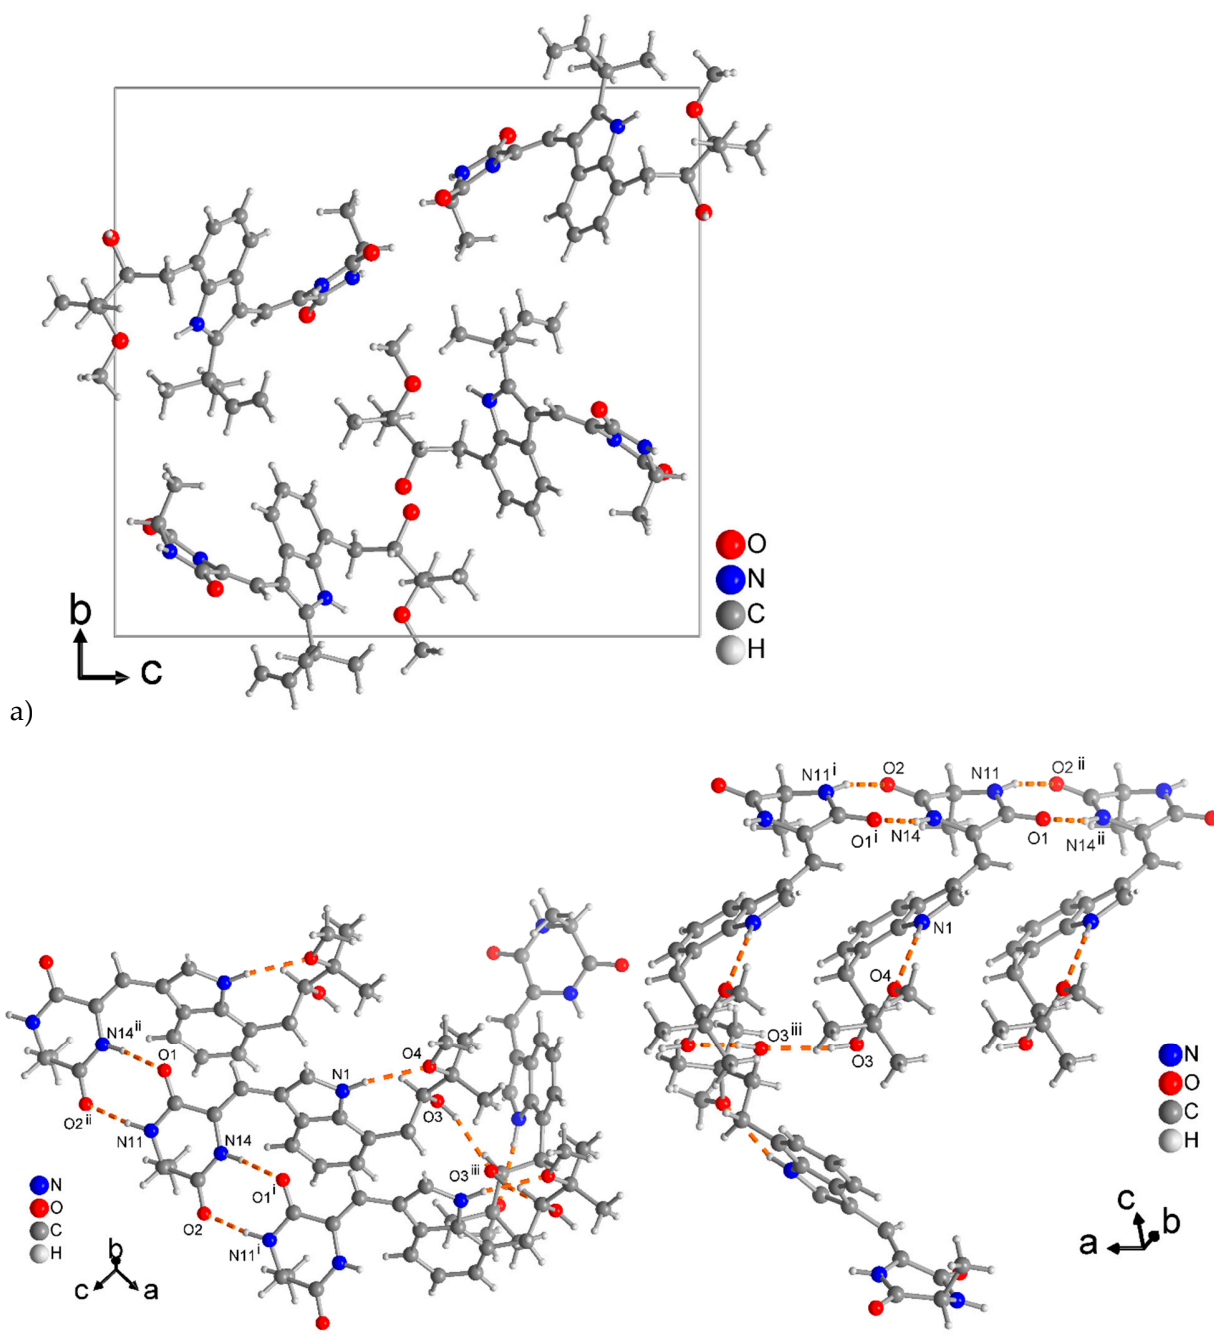

Figure S9. a) Section of the packing diagram over the unit cell of compound **2** determined by single-crystal x-ray diffraction. b) Hydrogen bond network as in dashed yellow lines around a molecule of **2** in the crystal (the dimethylvinylmethyl or prenyl group, -CMe<sub>2</sub>(CH=CH<sub>2</sub>) has been omitted for clarity). For details see Table S5 above.

Figure S10. X-ray crystallographic structure of compound 2

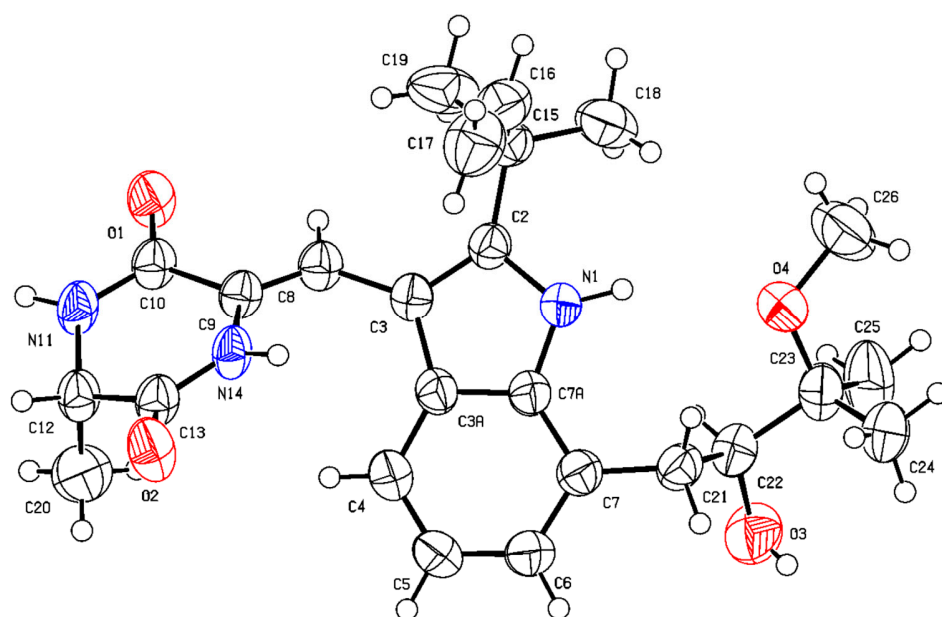

Supplement: s1 [file s1]
